# Supplementary material for: DAJIN enables multiplex genotyping to simultaneously validate intended and unintended target genome editing outcomes
Source: PLOS journal article supplement (doi:10.1371/journal.pbio.3001507), 2022-01-18
Supplement: S7 (10.1371/journal.pbio.3001507.s007) [file journal.pbio.3001507.s007.1.pdf]

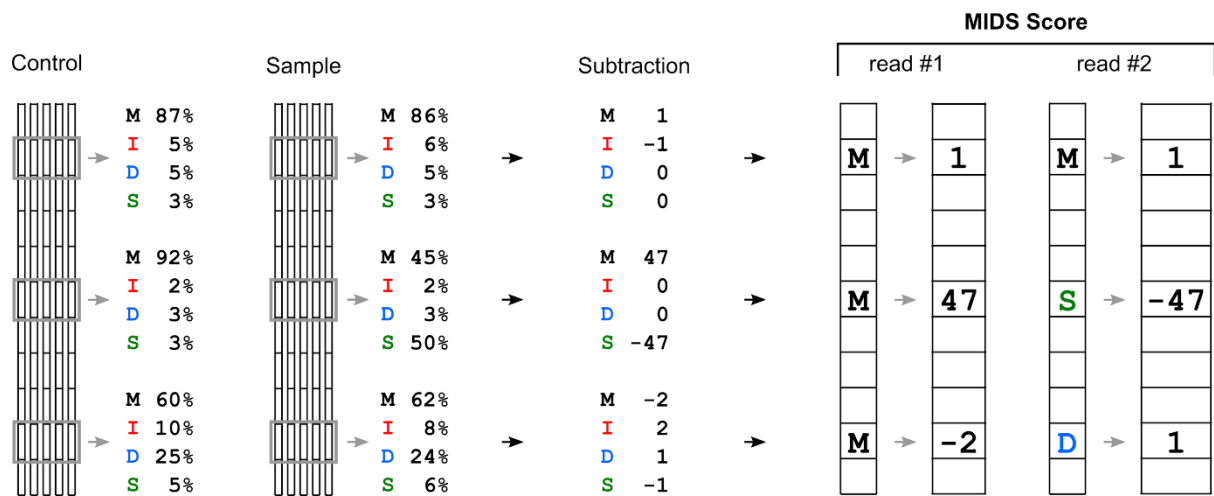

Fig. S7: **MIDS score.**

The black boxes represent sequences after compressed MIDS conversion. The grey boxes show representative base positions. MIDS score is calculated by subtracting the relative frequency of MIDS between a control and a sample.
